# Supplementary material for: Trends in the use of the Internet for health purposes in Poland
Source: Springer Nature journal article supplement (doi:10.1186/s12889-015-1473-3), 2015-02-26
Supplement: MOESM2 [file 9748770]

Additional file 2 Selected demographic characteristics and health conditions

| CHARACTERISTICS                                                                                                                                                                              | ALL RESPONDENTS<br>N =3027                    | ALL RESPONDENTS<br>%                             |
|----------------------------------------------------------------------------------------------------------------------------------------------------------------------------------------------|-----------------------------------------------|--------------------------------------------------|
| SEX: MEN<br>WOMEN                                                                                                                                                                            | 1454<br>1573                                  | 48,0<br>52,0                                     |
| AGE<br>Years (+/- SD)<br>Median (min-max)                                                                                                                                                    | 43,61 (+/- 17,5)<br>43 (15-94)                |                                                  |
| EDUCATION*:<br>A level<br>B level<br>C level                                                                                                                                                 | 1065<br>1251<br>711                           | 35,18<br>41,33<br>23,49                          |
| EMPLOYMENT STATUS<br>Paid work (including self-employment)<br>In education<br>Unemployed<br>Retired<br>Housework/care for children or other persons<br>Permanently sick or disabled<br>Other | 1359<br>409<br>224<br>681<br>191<br>145<br>18 | 44,9<br>13,5<br>7,4<br>22,5<br>6,3<br>4,8<br>0,6 |
| RESIDENCE: PLACE<br>Big cities (above 100000 residents)<br>Minor cities<br>Villages/rural area                                                                                               | 966<br>941<br>1120                            | 31,9<br>31,1<br>37,0                             |
| HEALTH STATUS (subjective assessment)<br>Very good<br>Good<br>Fair<br>Poor<br>Very poor                                                                                                      | 539<br>1204<br>1068<br>176<br>40              | 17,8<br>39,8<br>35,3<br>5,8<br>1,3               |
| FREQUENCY OF DOCTOR'S VISITS (during<br>last 12 months)<br>N (mean +/- SD)<br>Median (min-max)                                                                                               | 5,91 (+/- 8,54)<br>3 (0-99)                   |                                                  |
| CHRONIC DISEASES/DISABILITY<br>Yes, I personally<br>Yes, a person close to me<br>No                                                                                                          | 402<br>978<br>1647                            | 13,3<br>32,3<br>54,4                             |

\* The item related to the education of the respondents included eleven options, from basic to university level, specific to the Polish education system. The eleven levels were collapsed into three categories according to the International Standard Classification of Education (ISCED): (A) education level lower than upper secondary; (B) education level including upper secondary to post-secondary non-tertiary; and (C) education level covering all levels according to ISCED higher than post-secondary non-tertiary.
