# Supplementary material for: Trends in the use of the Internet for health purposes in Poland
Source: Springer Nature journal article supplement (doi:10.1186/s12889-015-1473-3), 2015-02-26
Supplement: MOESM3 [file 9748770]

Table S1 Internet usage by age and gender

| INTERNET USAGE         | 2005 (N=545)<br>% (CI) | 2007 (N =667)<br>% (CI) | 2012 (N=744)<br>% (CI) |
|------------------------|------------------------|-------------------------|------------------------|
| Age categories: 15 -29 | 47.3 (43.1-51.5)       | 42.3 (38.5-46.0)        | 30.8 (27.5-34.1)       |
| Male                   | 24.9 (21.3-28.6)       | 21.6 (18.5-24.7)        | 15.7 (13.1-13.8)       |
| Female                 | 22.4 (18.9-25.9)       | 20.7 (17.6-23.8)        | 15.1 (12.5-17.6)       |
| Age categories: 30-49  | 38.0 (33.9-42.1)       | 37.9 (34.2-41.6)        | 41.8 (38.3-45.3)       |
| Male                   | 21.5 (18.0-24.9)       | 21.0 (17.9-24.1)        | 21.1 (18.2-24.0)       |
| Female                 | 16.5 (13.4-19.6)       | 16.9 (14.1-19.8)        | 20.7 (17.8-23.6)       |
| Age categories: 50-64  | 12.5 (9.7-15.3)        | 16.1 (13.3-18.8)        | 22.0 (19.1-25.0)       |
| Male                   | 8.1 (5.8-10.4)         | 9.3 (7.1-11.5)          | 10.4 (8.2-12.5)        |
| Female                 | 4.4 (2.7- 6.1)         | 6.8 (4.8- 8.7)          | 11.6 (9.3-13.9)        |
| Age categories: 65-80+ | 2.2 (1.0-3.4)          | 3.7 (2.3-5.2)           | 5.4 (3.8-7.0)          |
| Male                   | 1.5 (0.5-2.5)          | 2.2 (1.1-3.4)           | 3.1 (1.8-4.3)          |
| Female                 | 0.7 (0.0-1.5)          | 1.5 (0.6-2.4)           | 2.3 (1.2-3.4)          |

Table S2 Internet health usage by age and gender

| INTERNET HEALTH USAGE  | 2005 (N=428)<br>% (CI) | 2007 (N=533)<br>% (CI) | 2012 (N=667)<br>% (CI) |
|------------------------|------------------------|------------------------|------------------------|
| Age categories: 15 -29 | 49.3 (44.6-54.0)       | 45.6 (41.4-49.8)       | 32.4 (28.8-35.9)       |
| Male                   | 24.3 (20.2-28.4)       | 21.2 (17.7-24.7)       | 15.9 (13.1-18.7)       |
| Female                 | 25.0 (20.9-29.1)       | 24.4 (20.7-28.0)       | 16.5 (13.7-19.3)       |
| Age categories: 30-49  | 37.7 (33.0-42.2)       | 36.4 (32.3-40.5)       | 42.0 (38.2-45.7)       |
| Male                   | 19.7 (15.9-23.4)       | 18.9 (15.6-22.3)       | 20.2 (17.2-23.3)       |
| Female                 | 18.0 (14.4-21.6)       | 17.5 (14.2-20.7)       | 21.8 (18.6-24.9)       |
| Age categories: 50-64  | 11.5 (8.4-14.5)        | 15.0 (12.0-18.0)       | 20.8 (17.8-23.9)       |
| Male                   | 6.8 (4.4- 9.2)         | 8.3 (5.9-10.6)         | 8.5 (6.4-10.7)         |
| Female                 | 4.7 (2.7- 6.7)         | 6.7 (4.6- 8.9)         | 12.3 (9.8-14.8)        |
| Age categories: 65-80+ | 1.6 (0.4-2.8)          | 3.0 (1.6-4.5)          | 4.8 (3.2-6.4)          |
| Male                   | 1.4 (0.3-2.5)          | 1.9 (0.7-3.0)          | 2.7 (1.5-3.9)          |
| Female                 | 0.2 (0.0-0.7)          | 1.1 (0.2-2.0)          | 2.1 (1.0-3.2)          |
