# Supplementary material for: Trends in the use of the Internet for health purposes in Poland
Source: Springer Nature journal article supplement (doi:10.1186/s12889-015-1473-3), 2015-02-26
Supplement: MOESM4 [file 9748770]

Table S3 Internet usage by gender

| INTERNET USAGE | 2005 (N=545)             | 2007 (N =667)            | 2012 (N=744)             |
|----------------|--------------------------|--------------------------|--------------------------|
|                | n<br>%<br>95%CI          | n<br>%<br>95%CI          | n<br>%<br>95%CI          |
| Sex: Male      | 305<br>56,0<br>51,8 60,1 | 361<br>54,1<br>50,3 57,9 | 375<br>50,4<br>46,8 54,0 |
| Sex: Female    | 240<br>44,0<br>39,9 48,2 | 306<br>45,9<br>42,1 49,7 | 369<br>49,6<br>46,0 53,2 |

Table S4 Internet health usage by gender

| INTERNET HEALTH USAGE | 2005 (N=428)             | 2007 (N=533)             | 2012 (N=667)             |
|-----------------------|--------------------------|--------------------------|--------------------------|
|                       | n<br>%<br>95%CI          | n<br>%<br>95%CI          | n<br>%<br>95%CI          |
| Sex: Male             | 223<br>52,1<br>47,4 56,8 | 268<br>50,3<br>46,0 54,5 | 316<br>47,4<br>43,6 51,2 |
| Sex: Female           | 205<br>47,9<br>43,2 52,6 | 265<br>49,7<br>45,5 54,0 | 351<br>52,6<br>48,8 56,4 |
