# Supplementary material for: Trends in the use of the Internet for health purposes in Poland
Source: Springer Nature journal article supplement (doi:10.1186/s12889-015-1473-3), 2015-02-26

Figure S1 Profile of Internet Users and Internet Non Users (INT+/INT-) in 2005 based on correspondence analysis

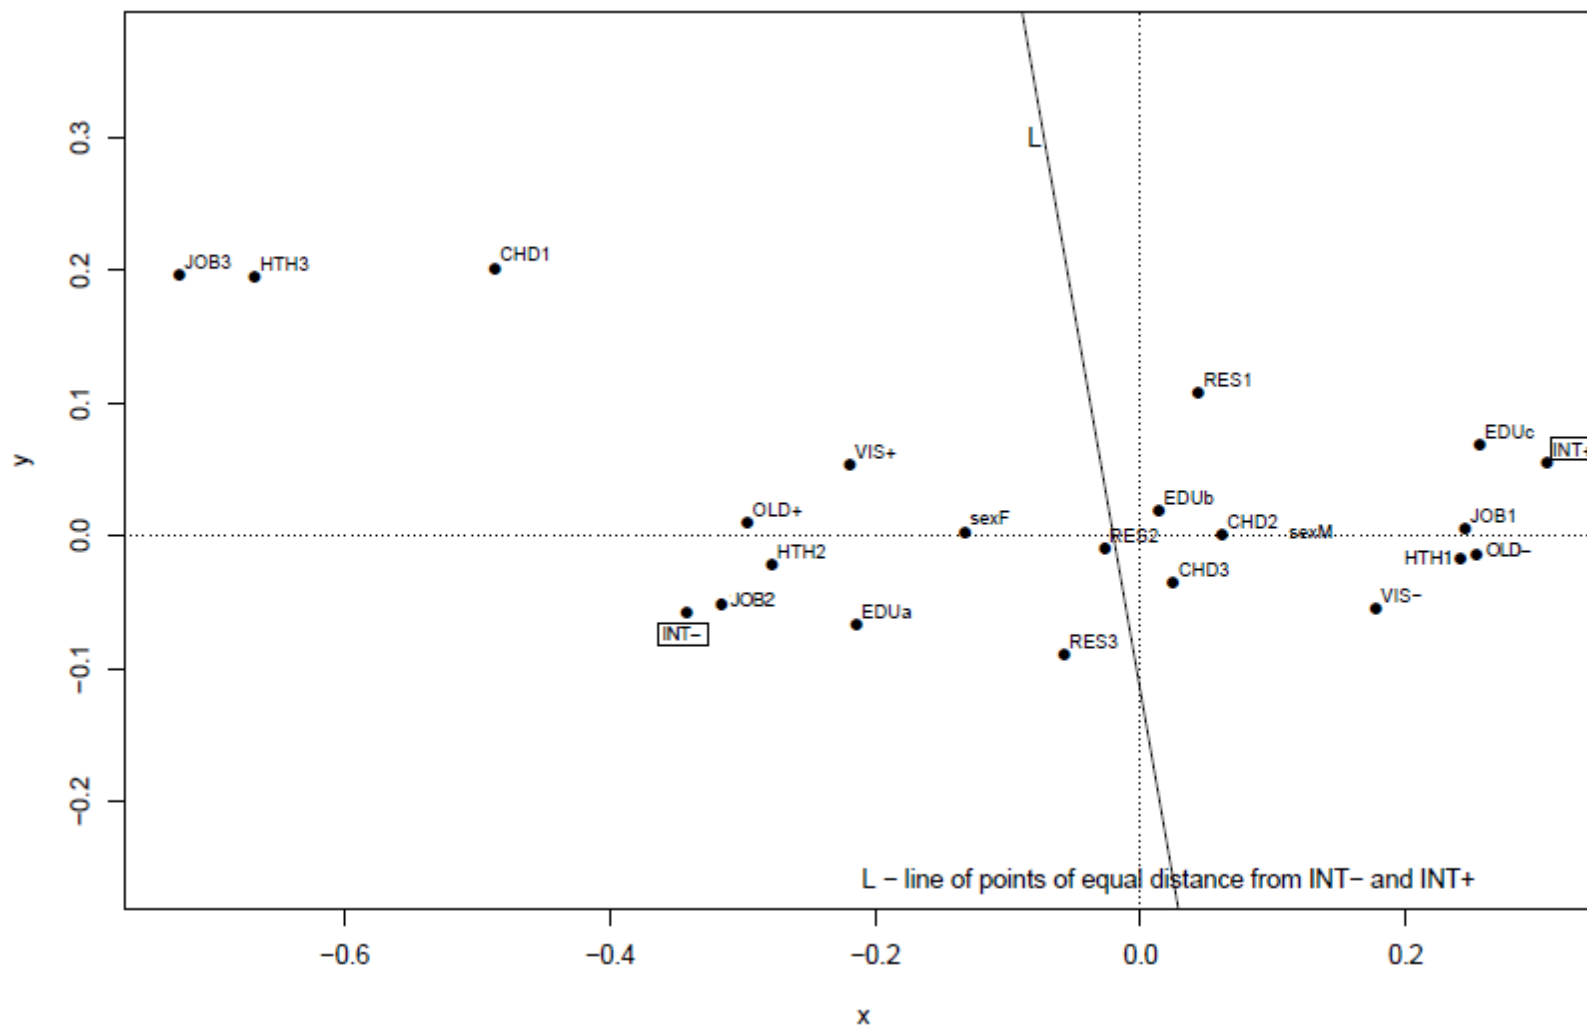

Figure S2 Profile of Internet Users and Internet Non Users (INT+/INT-) in 2007 based on correspondence analysis

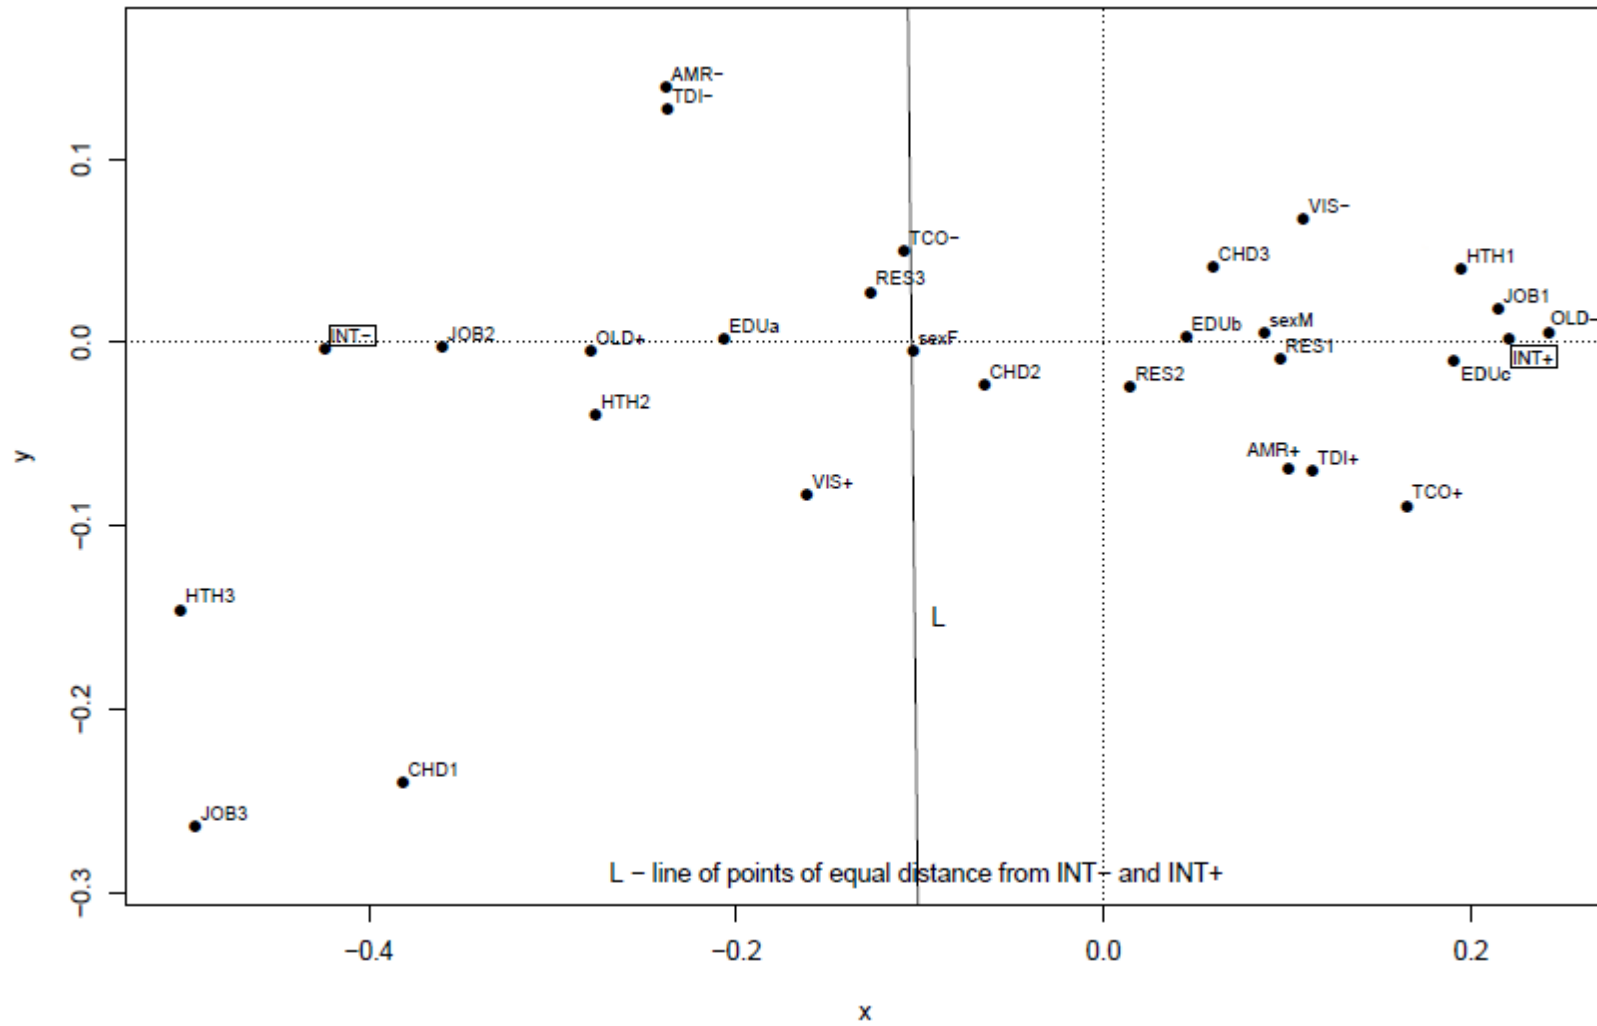

Supplement: MOESM5 [file 9748770]
