# Supplementary material for: Trends in the use of the Internet for health purposes in Poland
Source: Springer Nature journal article supplement (doi:10.1186/s12889-015-1473-3), 2015-02-26

Figure S3 Profile of persons who consider the Internet as an important or not important source of medical information (SMI+/SMI-) in 2005 based on correspondence analysis

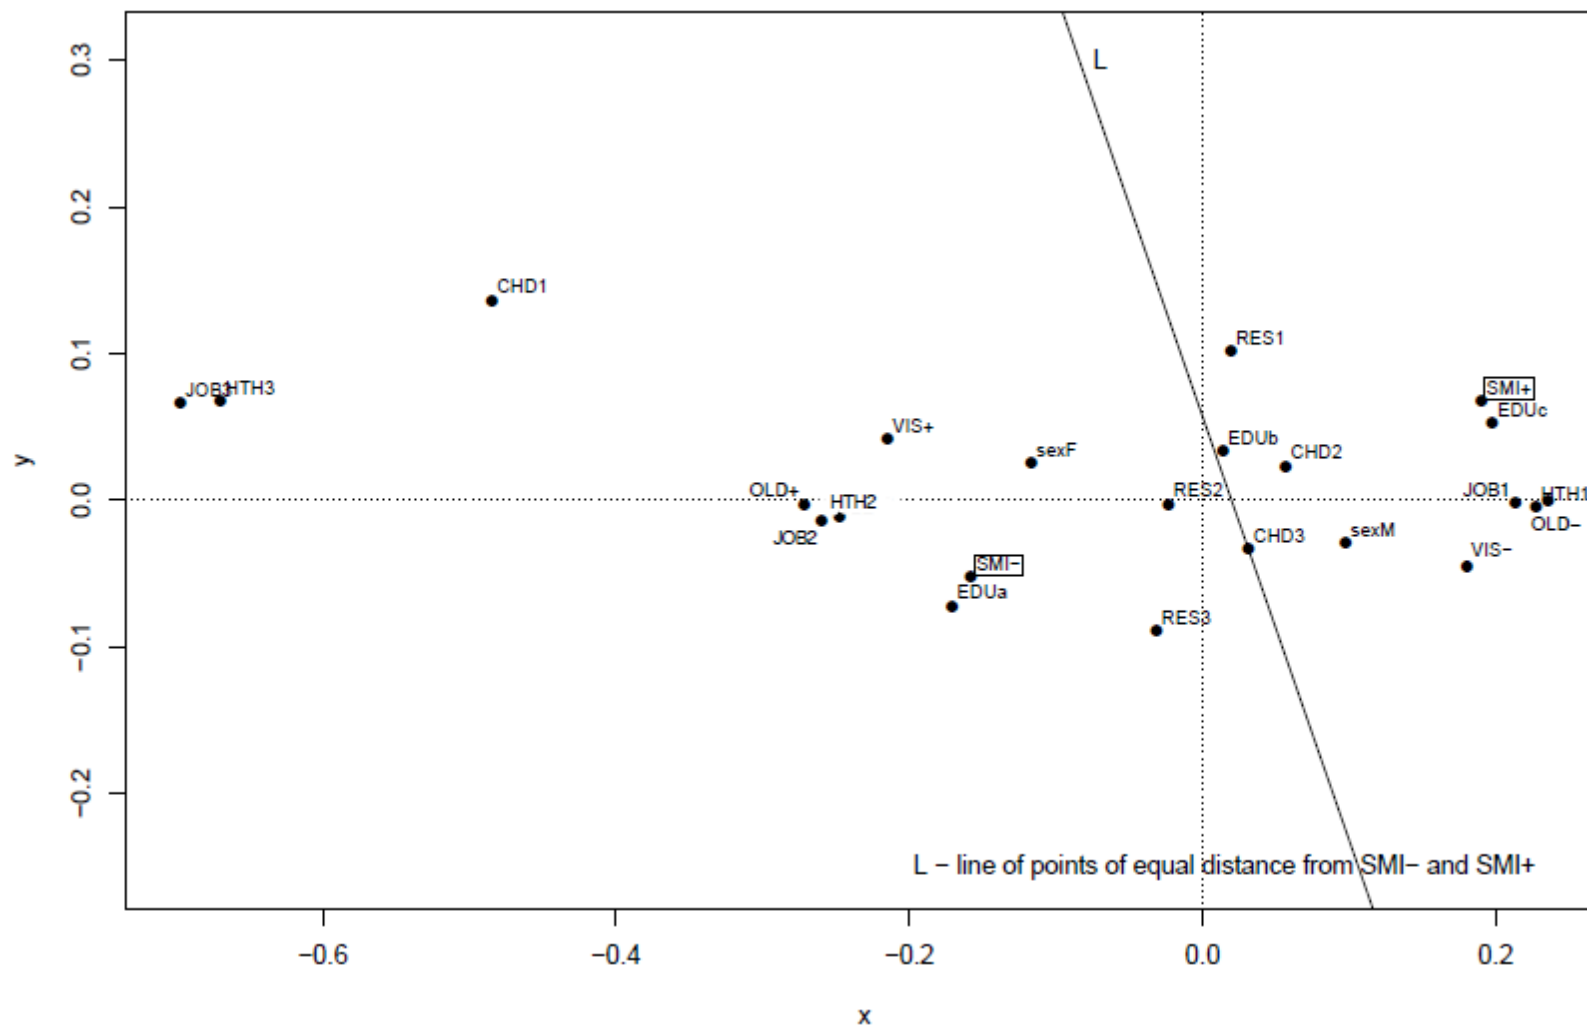

Figure S4 Profile of persons who consider the Internet as an important or not important source of medical information (SMI+/SMI-) in 2007 based on correspondence analysis

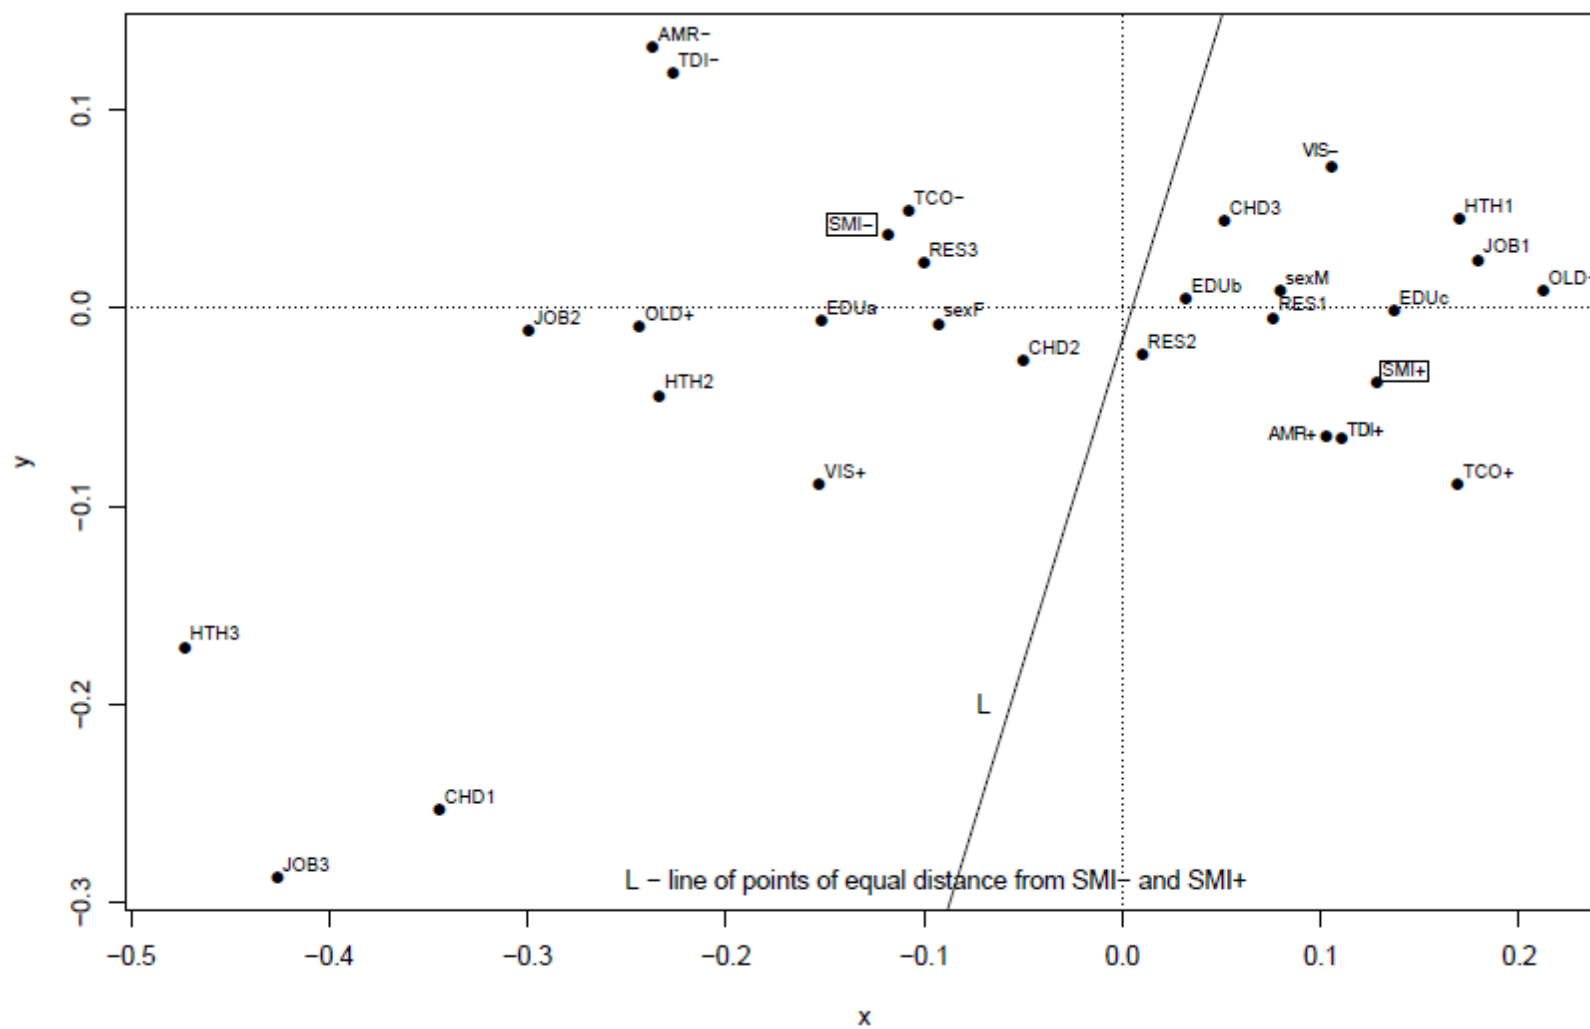

Supplement: MOESM7 [file 9748770]
